# Supplementary material
Source: PubMed Central journal article supplement (PMC7483973)
Supplement: NIHMS1589581-supplement-1589581_Sup_Legends.pdf [file NIHMS1589581-supplement-1589581_Sup_Legends.pdf]

Supplemental Figure 1- Forest plot displaying subset analysis for PFS and OS according to age and sex.

Supplemental Figure 2- Comparisons of (a) progression free survival and (b) overall survival between high-risk patients treated with auto-auto and auto-allo.
