# Supplementary material
Source: PubMed Central journal article supplement (PMC7483973)

## PFS

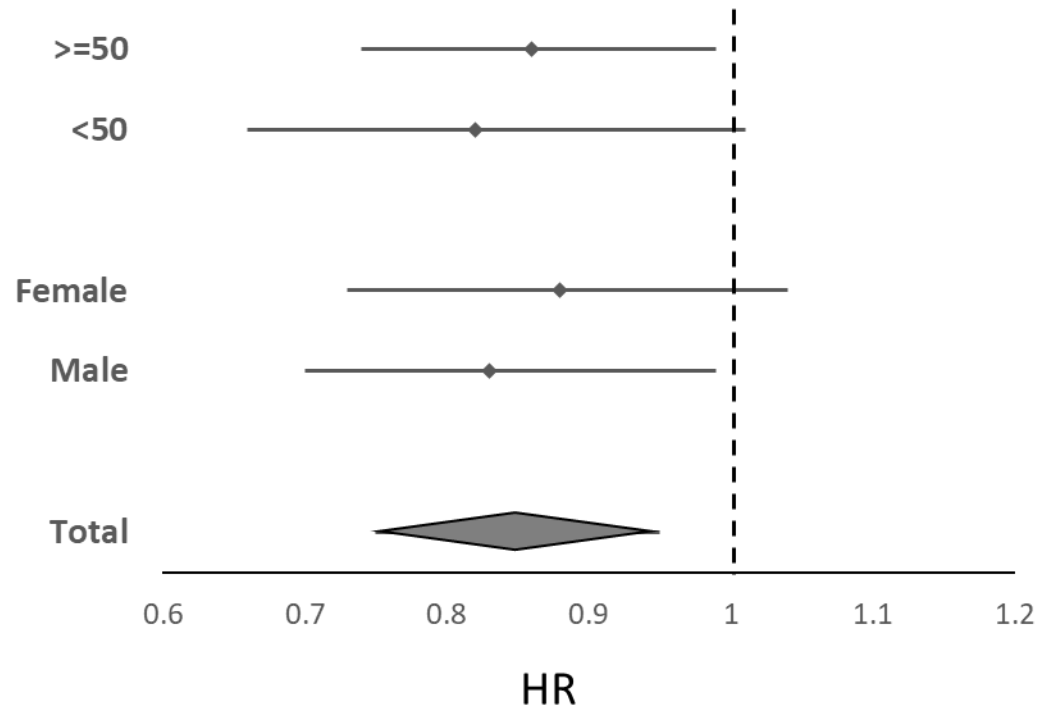

## OS

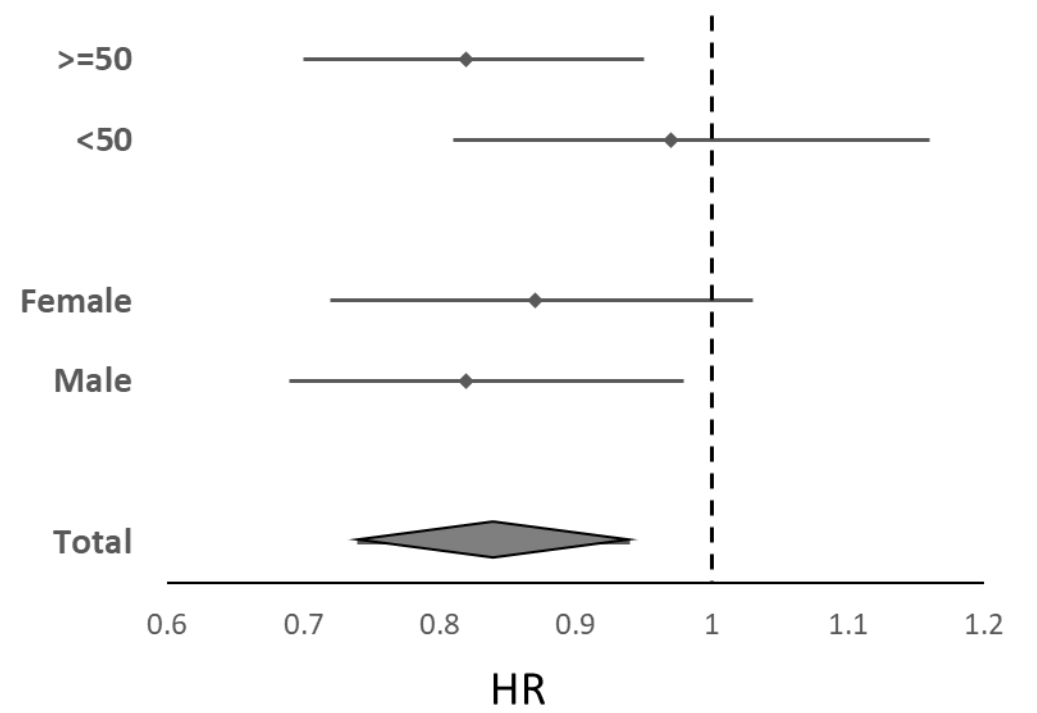

Supplement: NIHMS1589581-supplement-1589581_Sup_Fig_1.pdf [file NIHMS1589581-supplement-1589581_Sup_Fig_1.pdf]

**a**

Progression-Free Survival  
High-Risk

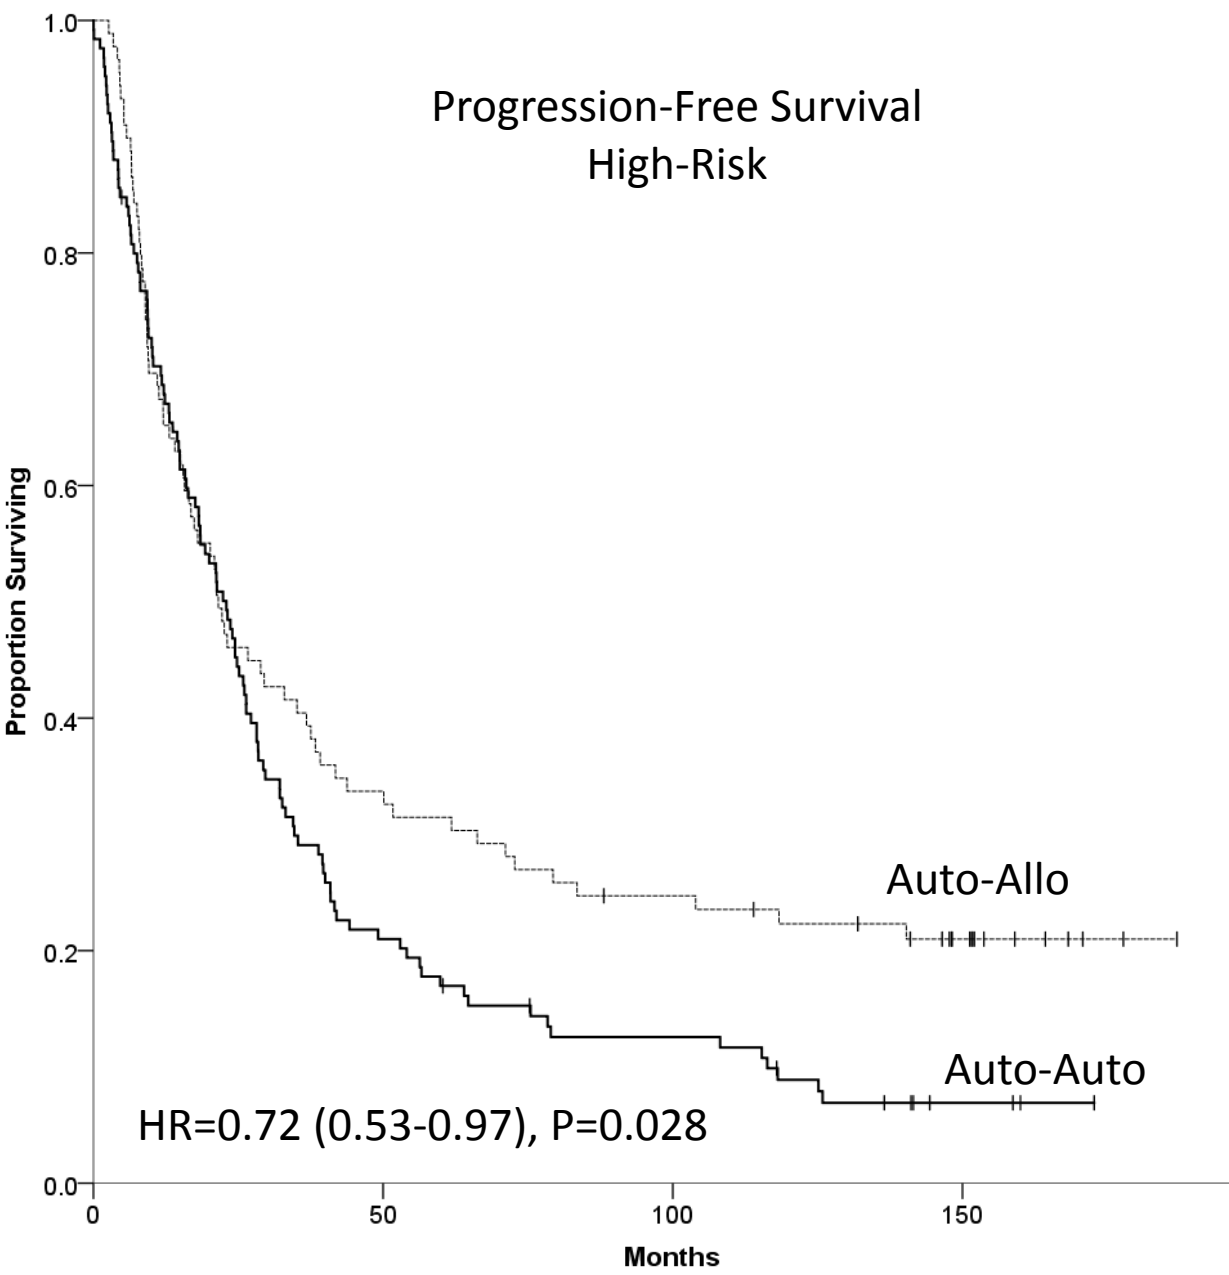**b**

Overall Survival  
High-Risk

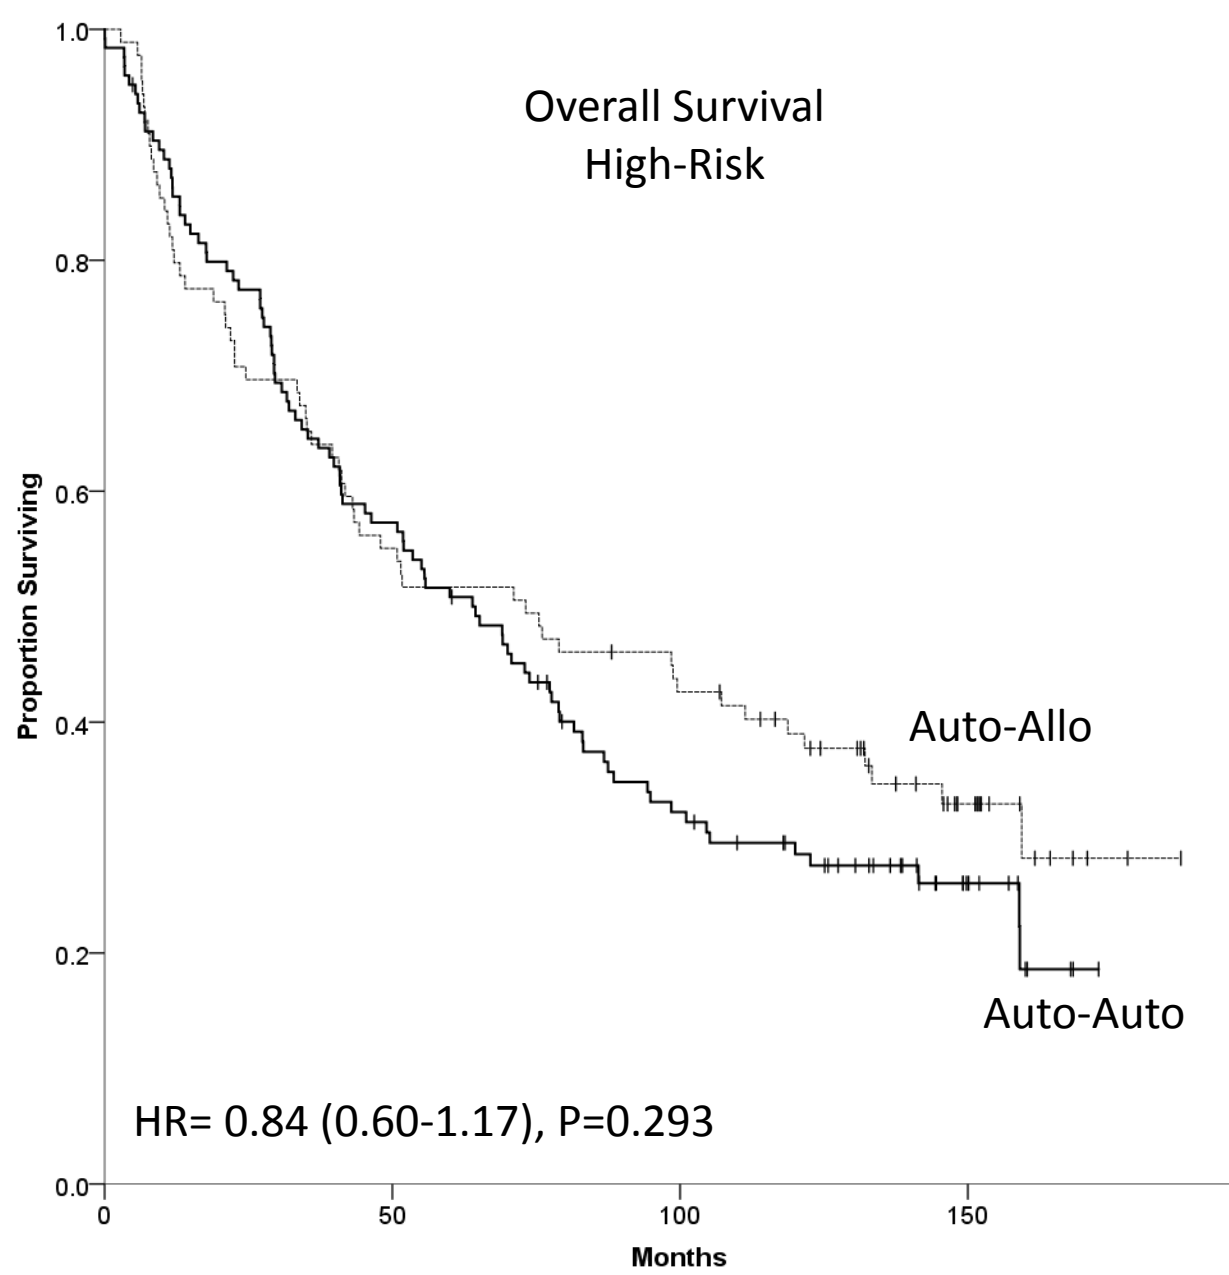

Supplement: NIHMS1589581-supplement-1589581_Sup_Fig_2.pdf [file NIHMS1589581-supplement-1589581_Sup_Fig_2.pdf]
